# Supplementary material for: Histone tails cooperate to control the breathing of genomic nucleosomes
Source: PLOS journal article supplement (doi:10.1371/journal.pcbi.1009013), 2021-06-03

**S3 Figure** : Radius of gyration of the histone tails. The evolution of the RoG over time for histones H3 and H2AC tails. (A) hH simulations. (B) dH simulations.

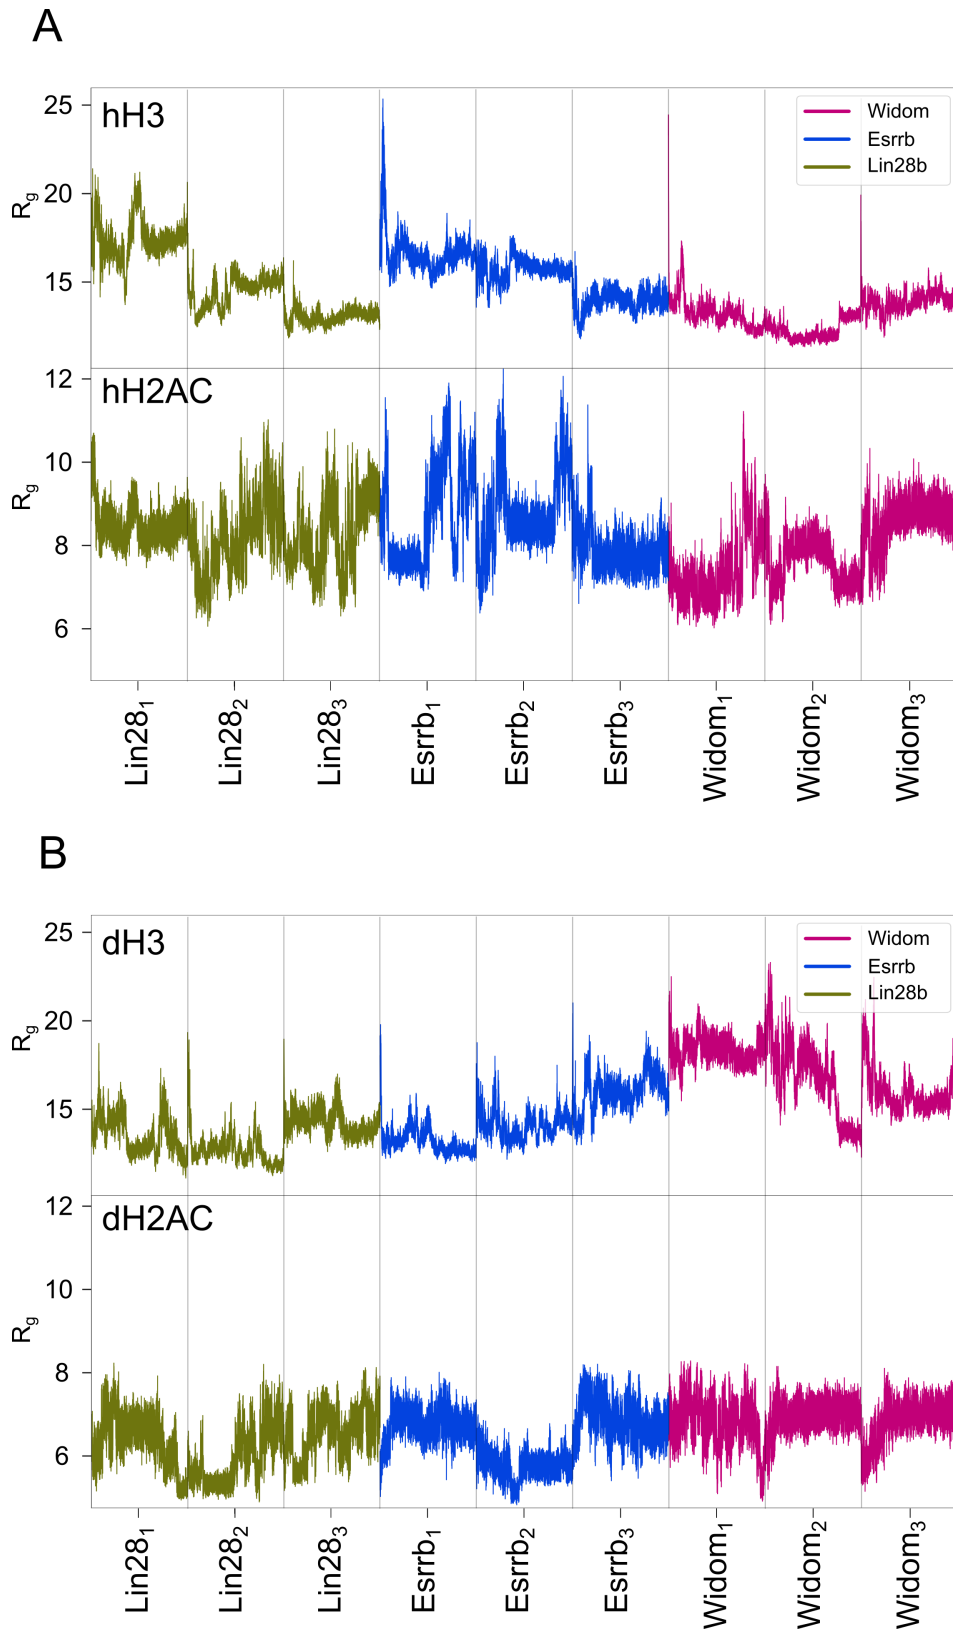

Supplement: S9 (10.1371/journal.pcbi.1009013.s009) [file journal.pcbi.1009013.s009]
